# Supplementary material for: Grape Seed Proanthocyanidins Improve White Adipose Tissue Expansion during Diet-Induced Obesity Development in Rats
Source: PubMed Central journal article supplement (PMC6163825; doi:10.3390/ijms19092632), 2018-09-05
Supplement: ijms-19-02632-s001.pdf [file ijms-19-02632-s001.pdf]

**Table S1. Body weights and deposition of white adipose tissue in rats after 12 weeks of feeding a standard (STD) diet, a cafeteria (CAF) diet, or a cafeteria diet with the daily administration of different doses of GSPE (CAF+GSPE).**

|                                  | STD                         | CAF                         | CAF + GSPE 25<br>mg/kg BW   | CAF + GSPE<br>100 mg/kg BW  | CAF + GSPE<br>200 mg/kg BW  |
|----------------------------------|-----------------------------|-----------------------------|-----------------------------|-----------------------------|-----------------------------|
| <i>Initial body weight (g)</i>   | 226.13 ± 3.18               | 235.50 ± 5.11               | 238.10 ± 4.26               | 238.70 ± 5.71               | 239.56 ± 4.86               |
| <i>Final body weight (g)</i>     | 406.1 ± 12.5 <sup>a</sup>   | 514.0 ± 15.1 <sup>b</sup>   | 513.5 ± 15.3 <sup>b</sup>   | 501.3 ± 22.6 <sup>b</sup>   | 487.4 ± 24.3 <sup>ab</sup>  |
| <i>Body weight increment (g)</i> | 169.63 ± 13.67 <sup>a</sup> | 276.14 ± 13.13 <sup>b</sup> | 275.40 ± 13.13 <sup>b</sup> | 262.60 ± 18.26 <sup>b</sup> | 253.89 ± 23.50 <sup>b</sup> |
| <i>rWAT weight (g)</i>           | 11.94 ± 2.95 <sup>a</sup>   | 23.70 ± 2.31 <sup>b</sup>   | 26.02 ± 1.60 <sup>b</sup>   | 23.49 ± 2.70 <sup>b</sup>   | 22.71 ± 2.40 <sup>ab</sup>  |
| <i>eWAT Weight(g)</i>            | 7.81 ± 0.90 <sup>a</sup>    | 22.60 ± 2.06 <sup>b</sup>   | 22.22 ± 1.88 <sup>b</sup>   | 21.92 ± 2.91 <sup>b</sup>   | 18.53 ± 1.98 <sup>b</sup>   |
| <i>mWAT Weight(g)</i>            | 4.39 ± 0.29 <sup>a</sup>    | 10.83 ± 1.74 <sup>b</sup>   | 10.17 ± 1.13 <sup>b</sup>   | 9.68 ± 1.30 <sup>b</sup>    | 10.26 ± 1.37 <sup>b</sup>   |
| <i>sWAT Weight(g)</i>            | 5.35 ± 0.49 <sup>a</sup>    | 14.25 ± 2.41 <sup>b</sup>   | 13.48 ± 1.85 <sup>b</sup>   | 12.20 ± 1.77 <sup>ab</sup>  | 13.14 ± 1.64 <sup>b</sup>   |
| <i>Adiposity index</i>           | 5.64 ± 0.74 <sup>a</sup>    | 10.97 ± 0.77 <sup>b</sup>   | 11.31 ± 0.57 <sup>b</sup>   | 10.22 ± 0.95 <sup>b</sup>   | 10.86 ± 0.71 <sup>b</sup>   |

The values are the means ± SEM (n=10). Statistical analyses were performed using one-way ANOVA. Different letters indicate significant differences between groups of at least  $p < 0.05$ .

*Abbreviations: BW: Body weight; rWAT: retroperitoneal white adipose tissue; eWAT: epididymal white adipose tissue; mWAT: mesenteric white adipose tissue; and sWAT: subcutaneous white adipose tissue.*

**Table S2. Correlation analysis of the different parameters analyzed in the study with the rWAT adipocyte volume and number of rats fed for 12 weeks with a standard (STD), a cafeteria (CAF) diet, or a cafeteria diet with the daily administration of 25 mg GSPE/kg body weight (BW), 100 mg GSPE/kg BW, or 200 mg GSPE/kg BW.**

| Variables                                 | Adipocyte volume        |                | Adipocyte number (x10 <sup>6</sup> ) |                |
|-------------------------------------------|-------------------------|----------------|--------------------------------------|----------------|
|                                           | Correlation coefficient | <i>p</i> value | Correlation coefficient              | <i>p</i> value |
| <i>Adipocyte volume</i>                   |                         |                | -0.431                               | 0.108          |
| <i>Adipocyte number (x10<sup>6</sup>)</i> | -0.431                  | 0.108          |                                      |                |
| <i>Body weight</i>                        | <b>0.554</b>            | <b>0.040</b>   | -0.030                               | 0.918          |
| <i>rWAT weight</i>                        | 0.330                   | 0.270          | 0.126                                | 0.681          |
| <i>eWAT weight</i>                        | <b>0.558</b>            | <b>0.038</b>   | -0.171                               | 0.559          |
| <i>mWAT weight</i>                        | 0.259                   | 0.392          | 0.407                                | 0.167          |
| <i>sWAT weight</i>                        | 0.312                   | 0.277          | 0.402                                | 0.154          |
| <i>Adiposity index</i>                    | 0.473                   | 0.102          | 0.136                                | 0.657          |
| <i>GLU (mg/dL)</i>                        | 0.312                   | 0.299          | -0.258                               | 0.394          |
| <i>Insulin (ng/mL)</i>                    | 0.306                   | 0.287          | 0.018                                | 0.951          |
| <i>Leptin (ng/mL)</i>                     | -0.147                  | 0.665          | 0.270                                | 0.421          |
| <i>HOMA-IR</i>                            | 0.211                   | 0.489          | -0.177                               | 0.563          |
| <i>QUICKI</i>                             | -0.125                  | 0.684          | 0.047                                | 0.878          |
| <i>TG</i>                                 | 0.235                   | 0.461          | -0.125                               | 0.700          |
| <i>TC</i>                                 | 0.222                   | 0.511          | -0.080                               | 0.815          |
| <i>HDL-c</i>                              | -0.292                  | 0.445          | 0.349                                | 0.357          |
| <i>Non-HDL-c</i>                          | 0.149                   | 0.751          | -0.676                               | 0.095          |
| <i>HDL/non-HDL-c</i>                      | -0.541                  | 0.210          | 0.696                                | 0.082          |
| <i>TC/HDL-c</i>                           | 0.463                   | 0.296          | <b>-0.758</b>                        | <b>0.048</b>   |

Correlations were calculated using all of the values obtained for all of the animals for each variable. The table shows the correlation coefficient that illustrates the level of correlation between variables between 0 (no correlation) and 1 (maximum correlation) level. Bold numbers indicate significant correlations ( $p \leq 0.05$ ).

**Table S3. Main polyphenols of the grape seed proanthocyanidin extract (GSPE).**

| <b>Compound</b>           | <b>Concentration (mg/g)</b> |
|---------------------------|-----------------------------|
| Gallic acid               | 31.07 ± 0.08                |
| Protocatechuic acid       | 1.34 ± 0.02                 |
| Vanillic acid             | 0.77 ± 0.04                 |
| Proanthocyanidin dimer B2 | 33.24 ± 1.39                |
| Proanthocyanidin dimer B1 | 88.80 ± 3.46                |
| Proanthocyanidin dimer B3 | 46.09 ± 2.07                |
| Catechin                  | 121.32 ± 3.41               |
| Epicatechin               | 93.44 ± 4.27                |
| Dimer gallate             | 8.86 ± 0.14                 |
| Epicatechin gallate       | 21.24 ± 1.08                |
| Epigallocatechin gallate  | 0.03 ± 0.00                 |
| Epigallocatechin          | 0.27 ± 0.03                 |
| Proanthocyanidin trimer   | 4.90 ± 0.47                 |
| Proanthocyanidin tetramer | 0.05 ± 0.01                 |

Adapted from Margalef *et al* [39]. The results are expressed as mg of phenolic compound/g of GSPE on a wet basis as the mean ± SD (n=3).

**Table S4. Primer sequences used for real time qPCR analysis.**

| Gene          | Primer sequences<br>(5' - 3')                                            | Product<br>size (bp) | Gen Bank<br>accession<br>no/reference |
|---------------|--------------------------------------------------------------------------|----------------------|---------------------------------------|
| <i>Adgre1</i> | CTTTGGCTATGGGCTCCCAGTC<br>GCAAGGAGGGCAGAGTTGATCGTG                       | 165                  | NM_001007557.1                        |
| <i>Cpt1</i>   | TAT CGT CGC ACA TTA GAC C<br>CAT CTA TGA CCT CCT GGC A                   | 751                  | NM_031559.2                           |
| <i>C/EBPβ</i> | CCA CGA CTT CCT TTC CGA CC<br>CGT AGT CGG ACG GCT TCT TG                 | 71                   | NM_024125.4                           |
| <i>Fasn</i>   | TCC CAG GTC TTG CCG TGC<br>GCG GAT GCC TAG GAT GTG TGC                   | 260                  | Sawano T. <i>et al.</i><br>[43]       |
| <i>Gpdh</i>   | CCC TTC CTC CAG GCT ACT CT<br>GAG CTC GGA AAG GTC ACA CA                 | 138                  | NM_022215.2                           |
| <i>Lep</i>    | CAT TTC ACA CAC GCA GTC GG<br>GCA AGC TGG TGA GGA TCT GT                 | 137                  | NM_013076.3                           |
| <i>Lpl</i>    | ACT GGT GGG ACA GGA TGT GG<br>CCG TTC TGC ATA CTC AAA GTT<br>AGG         | 196                  | Kroupa O. <i>et al.</i><br>[44]       |
| <i>Pgc1α</i>  | TGC CCC TGC CAG TCA CAG GA<br>GCT CAG CCG AGG ACA CGA GG                 | 177                  | Distel E. <i>et al.</i><br>[45]       |
| <i>Pparγ</i>  | AGG ATT CAT GAC CAG GGA GTT<br>AGC AAA CTC AAA CTT AGC CTC<br>CAT        | 79                   | Dovinová I. <i>et al.</i><br>[46]     |
| <i>Ppia</i>   | CTT CGA GCT GTT TGC AGA CAA<br>AAG TCA CCA CCC TGG CAC ATG               | 138                  | NM_017101.1                           |
| <i>Prdm16</i> | GTT CTG CGT GGA TGC CAA TC<br>TGG CGA GGT TTT GGT CAT CA                 | 89                   | XM_008764418.1                        |
| <i>Sirt1</i>  | TTG GCA CCC ATC CTC GAA<br>ACA GAA ACC CCA GCT CCA                       | 217                  | XM_006223877.1                        |
| <i>Ucp1</i>   | CGA GCC AAG ATG GTG AGT TCG<br>ACA<br>GTG GTG ATG GTC CCT AAG ACA<br>CCT | 200                  | NM_012682.2                           |

**Abbreviations:** Adgre1: adhesion G protein-coupled receptor E1; CPT1: carnitine palmitoyl transferase I; C/EBPβ: CCAAT/enhancer binding protein beta; FASN: fatty acid synthase; GPDH: glycerol-3-phosphate dehydrogenase; LEP: leptin; LPL: lipoprotein lipase; Pgc1α: PPARγ coactivator 1 alpha; Pparγ: peroxisome proliferator-activated receptor gamma; Ppia: peptidylpropyl isomerase A (Cyclophilin A); Prdm16: PR domain containing 16; Sirt1: Sirtuin 1; UCP1: uncoupling protein 1.
